# Supplementary material for: Isolation of Epizootic Hemorrhagic Disease Virus Serotype 10 from Culicoides tainanus and Associated Infections in Livestock in Yunnan, China
Source: MDPI journal article supplement (doi:10.3390/v16020175), 2024-01-24
Supplement: s1 [file s1]

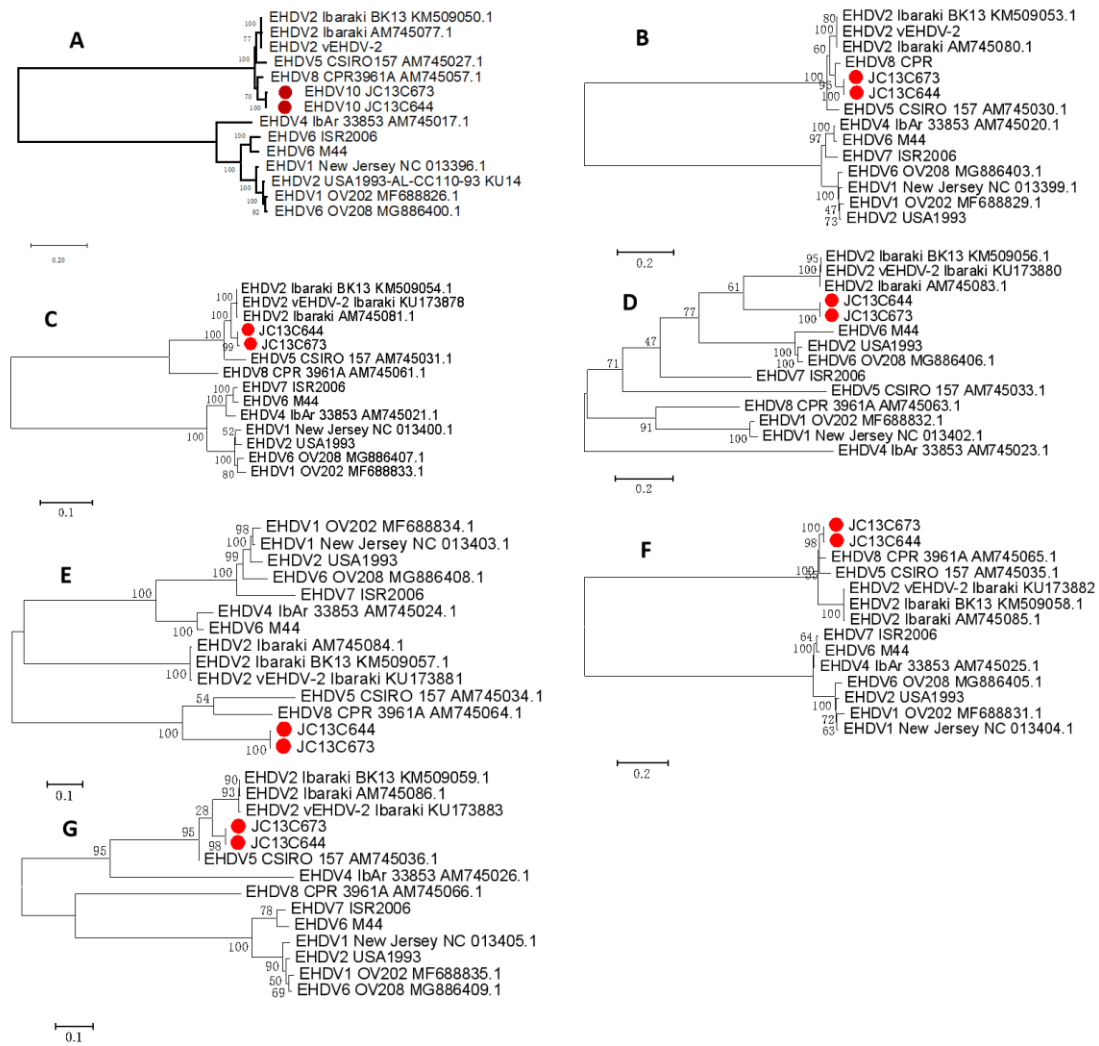

**Figure S1.** ML phylogenetic trees of Seg-1 (A), Seg-4(B), Seg-5(C), Seg-7(D), Seg-8(E), Seg-9(F) and Seg-10(G) of JC13C673 and JC13C644 strains EHDV isolated from the border area shared by China, Laos, and Vietnam. The best substitution model is TN93+G+I(Seg-1), TN93+I(Seg-4), TN+I(Seg-5), GTR+G+I(Seg-7), HKY+G+I(Seg-8), TN93+I(Seg-9) and HKY+G(Seg-10); The bootstrap value is 1000.

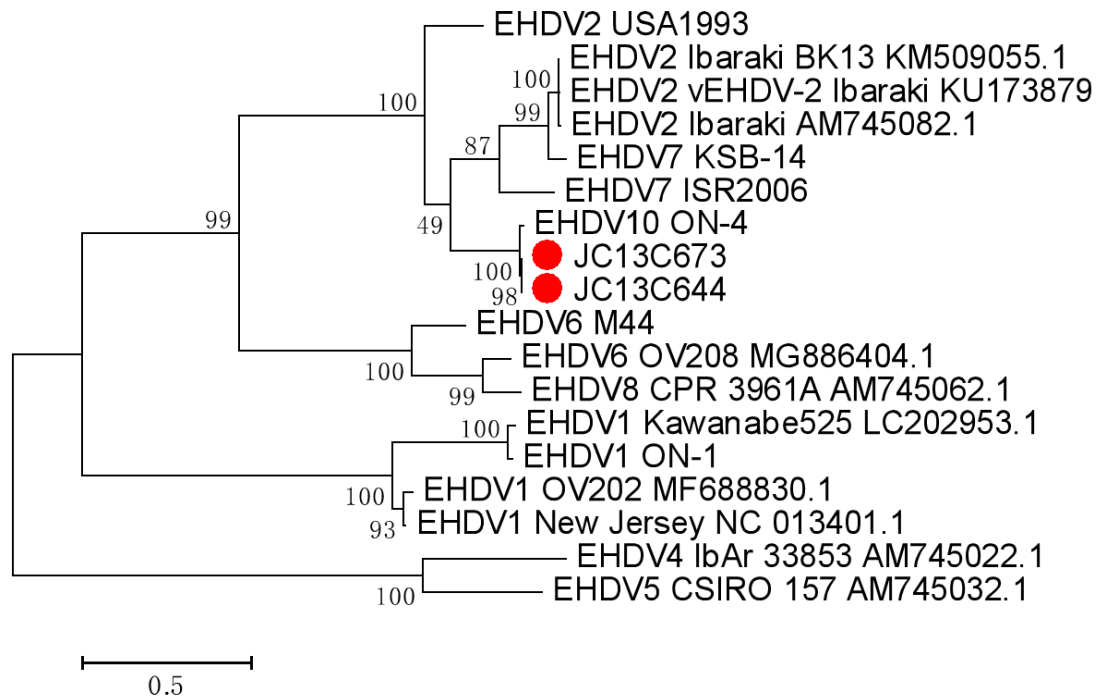

**Figure S2.** ML phylogenetic trees of Seg-6 of JC13C673 and JC13C644 strains EHDV isolated from the border area shared by China, Laos, and Vietnam. The best substitution model is GTR+G(Seg-6); The bootstrap value is 1000.

**Table S1.** The sequence information used in this study.

| NO. | strain          | location                      | host                   | date | LOCUS                                                                                              | Serotype |
|-----|-----------------|-------------------------------|------------------------|------|----------------------------------------------------------------------------------------------------|----------|
| 1   | Kawanabe525     | Japan:Kagoshima(JP)           | Bos taurus             | 1985 | LC202942, LC202942, LC202953                                                                       | EHDV1    |
| 2   | ON-1/E/13       | Japan:Okinawa(JP)             | Bos taurus             | 2013 | LC202950, LC202972, LC202961                                                                       | EHDV1    |
| 3   | OV202           | USA                           | Odocoileus virginianus | 2015 | MF688826-MF688835                                                                                  | EHDV1    |
| 4   | USA1955/01      | USA:New Jersey(NJ)            | unk                    | 1955 | NC_013397-NC_013405                                                                                | EHDV1    |
| 5   | 6010            | France: Reunion Island        | cattle                 | unk  | JX965387.1 (VP2)                                                                                   | EHDV1    |
|     | Ibaraki         | Japan(JP)                     | Cattle                 | 1959 | AM745077.1-AM745086.1                                                                              | EHDV2    |
| 6   | Ibaraki BK13    | Japan(JP)                     | cattle                 | 1997 | KM509050.1-KM509059.1                                                                              | EHDV2    |
| 7   | 4976            | France: Guadeloupe Island(FR) | cattle                 | 2011 | JX965386.1 (VP2)                                                                                   | EHDV2    |
| 8   | vEHDV-2 Ibaraki | Italy                         | unk                    | 2011 | KU173874.1-KU173883.1                                                                              | EHDV2    |
| 9   | CC110-93        | USA: Alabama(AL)              | unk                    | 1993 | KU140734.1 (VP2)                                                                                   | EHDV2    |
| 10  | IbAr 33853      | Nigeria                       | Culicoides spp.        | 1968 | AM745017- AM745026                                                                                 | EHDV4    |
| 11  | CSIRO 157       | Australia                     | cattle                 | 1977 | AM745027.1- AM745036.1                                                                             | EHDV5    |
| 12  | M44/96          | South Africa                  | Bos taurus (cattle)    | 1996 | HM636907.1-HM636916.1                                                                              | EHDV6    |
| 13  | OV208           | USA                           | Odocoileus virginianus | 2016 | MG886400.1- MG886409.1                                                                             | EHDV6    |
| 14  | Guadeloupe/5124 | France: Guadeloupe Island     | bovine                 | 2010 | HQ848380.1 (VP2)                                                                                   | EHDV6    |
| 15  | HG-1/E/15       | Japan:Hyogo(JP)               | Bos taurus             | 2015 | LC320035.1 (VP2) , LC320035.1 (VP3)                                                                | EHDV6    |
| 16  | ISR2006/02      | Israel: Jordan Valley         | cattle                 | 2006 | KM391743, KM391727, KM391737, KM391751, KM391725, KM391753, KM391739, KM391745, KM391736, KM391732 | EHDV7    |
| 17  | KSB-14/E/97     | Japan:Kagoshima(JP)           | Bos taurus             | 1997 | LC202943.1 (VP2) , LC202954.1 (VP3) , LC202965.1 (VP5)                                             | EHDV7    |
| 18  | YN09-04         | China:Yunnan                  | Cattle                 | 2013 | MK656453.1-MK656462.1                                                                              | EHDV7    |
| 19  | CPR 3961A       | Australia                     | Cattle                 | 1982 | AM745057-AM745066                                                                                  | EHDV8    |
| 20  | ON-4/B/98       | Japan:Okinawa(JP)             | Bos taurus             | 1998 | LC202944.1 (VP2) , LC202955.1 (VP3) , LC202966.1 (VP5)                                             | EHDV10   |
| 21  | JC13C673        | China:Yunnan(YN)              | Culicoides             | 2013 | MT013314-MT013323                                                                                  | EHDV10   |
| 22  | JC13C644        | China:Yunnan(YN)              | Culicoides             | 2013 | MT013324-MT013333                                                                                  | EHDV10   |

Note: unk refers to the information is unknown
